# Supplementary material for: Pediococcus pentosaceus IM96 Exerts Protective Effects against Enterohemorrhagic Escherichia coli O157:H7 Infection In Vivo
Source: MDPI journal article supplement (doi:10.3390/foods10122945), 2021-11-30
Supplement: s1 [file s1]

**A**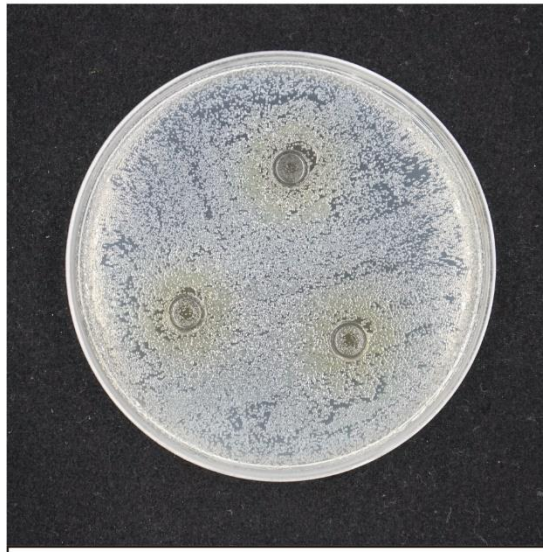**Control****B**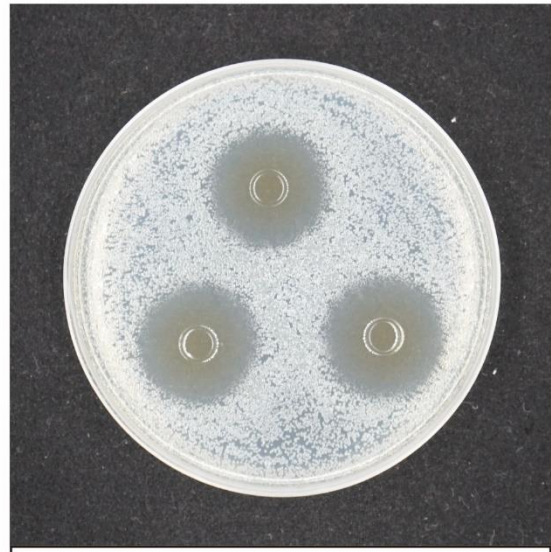***Pediococcus pentosaceus* IM96**

**Figure S1.** Antibacterial experiment of *P. pentosaceus* IM96 *In vitro*. (A) MRS liquid medium; (B) CFS of *P. pentosaceus* IM96.

**A**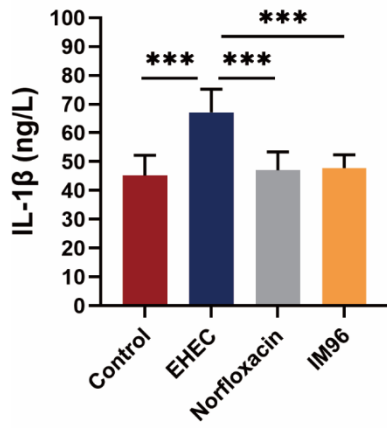**B**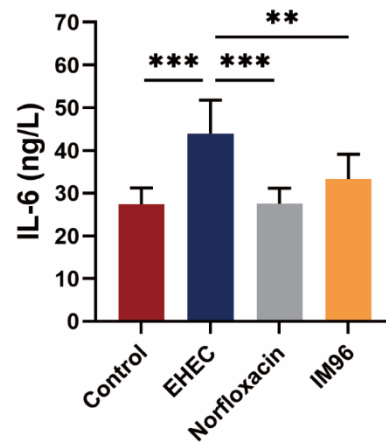

**Figure S2.** *P. pentosaceus* IM96 relieved EHEC O157:H7-induced inflammation in serum of the mice. (A) IL-1 $\beta$ ; (B) IL-6. All of the data are expressed as the mean $\pm$ SD (n=8), \*\*  $p < 0.01$ , and \*\*\*  $p < 0.001$ .

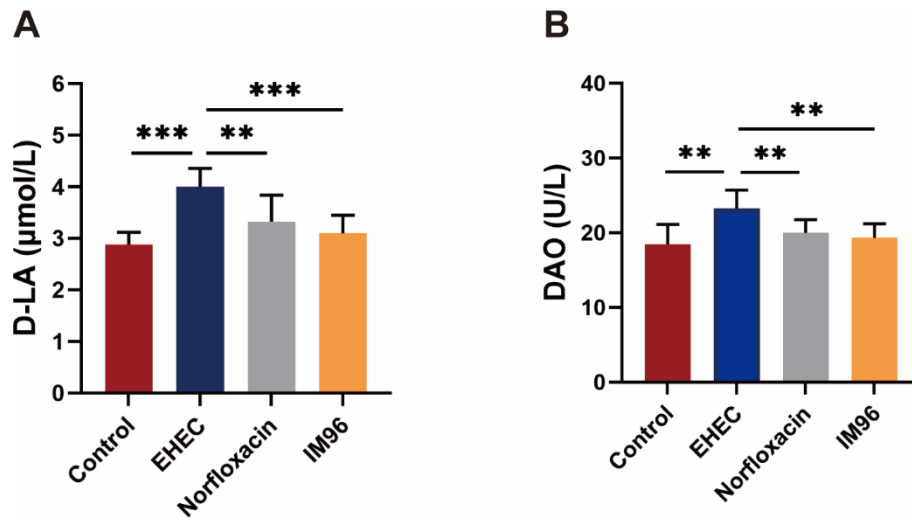

**Figure S3.** *P. pentosaceus* IM96 ameliorated the intestinal permeability disrupted by EHEC O157:H7. (A) D-LA; (B) DAO. All of the data are expressed as the mean $\pm$ SD (n=8), \*\*  $p < 0.01$ , and \*\*\*  $p < 0.001$ .

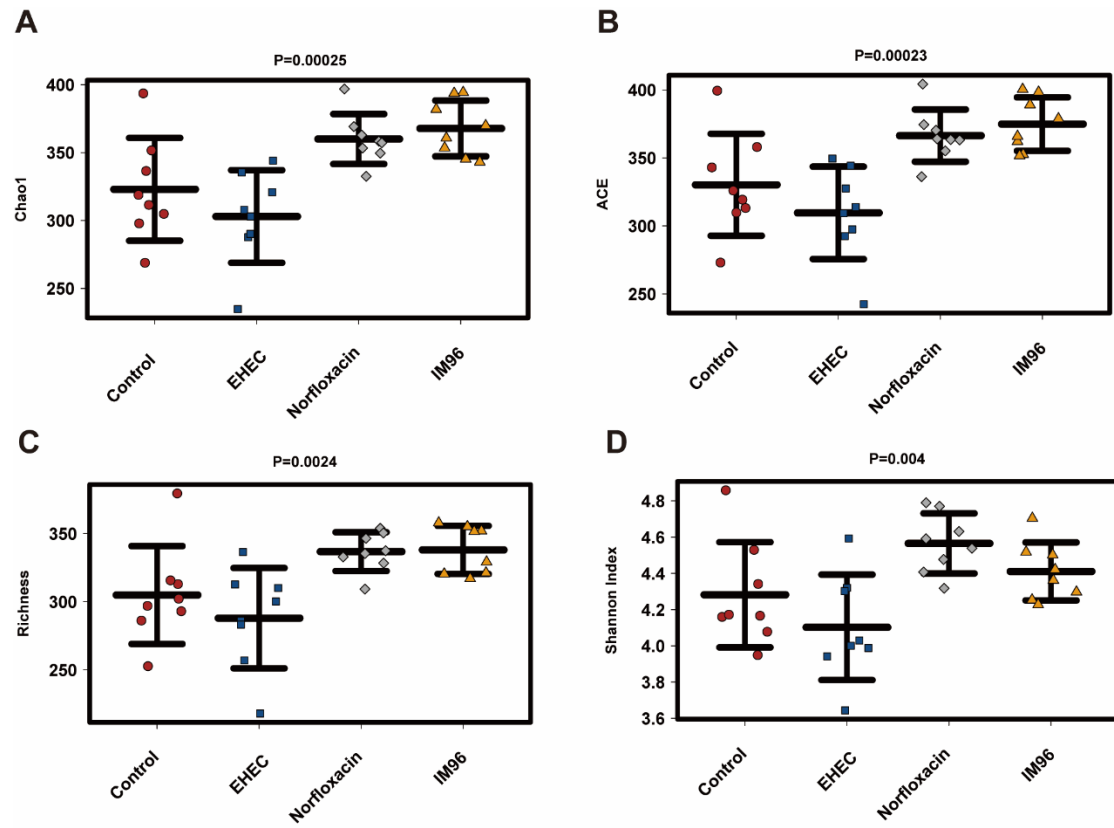

**Figure S4.** *P. pentosaceus* IM96 increased the alpha diversity of intestinal microbiota. (A) Chao1; (B) ACE; (C) Richness; (D) Shannon index.
